# Supplementary material for: Implications of Poly(A) Tail Processing in Repeat Expansion Diseases
Source: MDPI journal article supplement (doi:10.3390/cells11040677), 2022-02-15
Supplement: s1 [file s1]

**Table S1.** Repeat expansion diseases.

|           | <b>Disease</b>                                                                      | <b>Mutant gene</b> | <b>Repeat motif</b> | <b>Repeat tract location</b> |
|-----------|-------------------------------------------------------------------------------------|--------------------|---------------------|------------------------------|
| <b>1</b>  | <b>Benign adult familial myoclonic epilepsy (BAFME)</b>                             | <i>SAMD12</i>      | e.g. TTTCA          | Intron                       |
| <b>2</b>  | <b>Baratela-Scott Syndrome</b>                                                      | <i>XYLT1</i>       | GGC                 | Promoter                     |
| <b>3</b>  | <b>C9ORF72-mediated ALS/FTD</b>                                                     | <i>C9ORF72</i>     | GGGGCC              | Intron                       |
| <b>4</b>  | <b>Cerebellar ataxia, neuropathy, and vestibular areflexia syndrome (CANVAS)</b>    | <i>RFC1</i>        | AAGGG               | Intron                       |
| <b>5</b>  | <b>Cleidocranial dysplasia (CCD)</b>                                                | <i>RUNX2</i>       | GCN                 | Exon                         |
| <b>6</b>  | <b>Congenital central hypoventilation syndrome (CCHS)</b>                           | <i>PHOX2B</i>      | GCN                 | Exon                         |
| <b>7</b>  | <b>Myotonic dystrophy type 1 (DM1)</b>                                              | <i>DMPK</i>        | CTG                 | 3'-UTR                       |
| <b>8</b>  | <b>Myotonic dystrophy type 2 (DM2)</b>                                              | <i>CNBP1</i>       | CCTG                | Intron                       |
| <b>9</b>  | <b>Dentatorubro-pallidoluysian atrophy (DRPLA)</b>                                  | <i>ATN1</i>        | CAG                 | Exon                         |
| <b>10</b> | <b>Familial adult myoclonic epilepsy types 1-7 (FAME 1-7)</b>                       | Various            | TTTCA               | Intron                       |
| <b>11</b> | <b>Fuchs endothelial corneal dystrophy (FECD)</b>                                   | <i>TCF4</i>        | CTG                 | Intron                       |
| <b>12</b> | <b>Fragile XE syndrome (FRAXE)</b>                                                  | <i>AFF2/FMR2</i>   | CCG                 | 5'-UTR                       |
| <b>13</b> | <b>Friedreich ataxia (FRDA)</b>                                                     | <i>FXN</i>         | GAA                 | Intron                       |
| <b>14</b> | <b>Fragile X syndrome; Fragile X-associated tremor/ataxia syndrome (FXS; FXTAS)</b> | <i>FMR1</i>        | CGG                 | 5'-UTR                       |
| <b>15</b> | <b>Glutaminase deficiency</b>                                                       | <i>GLS</i>         | CAG                 | 5' UTR                       |
| <b>16</b> | <b>Huntington's disease (HD)</b>                                                    | <i>HTT</i>         | CAG                 | Exon                         |
| <b>17</b> | <b>Huntington disease-like 2 (HDL2)</b>                                             | <i>JPH3</i>        | CTG                 | Exon                         |
| <b>18</b> | <b>Hand-foot-genital syndrome (HFGS)</b>                                            | <i>HOXA13</i>      | GCN                 | Exon                         |
| <b>19</b> | <b>Holoprosencephaly 5 (HPE5)</b>                                                   | <i>ZIC2</i>        | GCN                 | Exon                         |
| <b>20</b> | <b>Jacobsen syndrome</b>                                                            | <i>CBL2</i>        | CCG                 | 5'-UTR                       |
| <b>21</b> | <b>Neuronal intranuclear inclusion disease (NIID)</b>                               | <i>NOTCH2/NLC</i>  | CGG                 | 5'-UTR                       |

|    |                                           |                            |             |          |
|----|-------------------------------------------|----------------------------|-------------|----------|
| 22 | Oculopharyngeal muscular dystrophy (OPMD) | <i>PAPBN1</i>              | GCG         | Exon     |
| 23 | X-linked hypopituitarism (PHPX)           | <i>SOX3</i>                | GCN         | Exon     |
| 24 | Spinal and bulbar muscular atrophy (SBMA) | <i>AR</i>                  | CAG         | Exon     |
| 25 | Spinocerebellar ataxia type 1 (SCA1)      | <i>ATXN1</i>               | CAG         | Exon     |
| 26 | Spinocerebellar ataxia type 2 (SCA2)      | <i>ATXN2</i>               | CAG         | Exon     |
| 27 | Spinocerebellar ataxia type 3 (SCA3)      | <i>ATXN3</i>               | CAG         | Exon     |
| 28 | Spinocerebellar ataxia type 6 (SCA6)      | <i>CACNA1A</i>             | CAG         | Exon     |
| 29 | Spinocerebellar ataxia type 7 (SCA7)      | <i>ATXN7</i>               | CAG         | Exon     |
| 30 | Spinocerebellar ataxia type 8 (SCA8)      | <i>ATXN8/ATXN8OS</i>       | CAG/CTG     | 3'-UTR   |
| 31 | Spinocerebellar ataxia type 10 (SCA10)    | <i>ATXN10</i>              | ATTCT       | Intron   |
| 32 | Spinocerebellar ataxia type 12 (SCA12)    | <i>PPP2R2B</i>             | CAG         | 5'-UTR   |
| 33 | Spinocerebellar ataxia type 17 (SCA17)    | <i>TBP</i>                 | CAG         | Exon     |
| 34 | Spinocerebellar ataxia type 31 (SCA31)    | <i>TK2</i> and <i>BEAN</i> | TGGA        | Intron   |
| 35 | Spinocerebellar ataxia type 36 (SCA36)    | <i>NOP56</i>               | GGCCTG      | Intron   |
| 36 | Spinocerebellar ataxia type 37 (SCA37)    | <i>DAB1</i>                | ATTTC       | Intron   |
| 37 | Unverricht–Lundborg disease (ULD)         | <i>CSTB</i>                | CCCCGCCCGCG | Promoter |
| 38 | X-linked dystonia parkinsonism (XDP)      | <i>TAF1</i>                | CCCTCT      | Intron   |
| 39 | X-linked intellectual disability (XLMR)   | <i>ARX</i>                 | GCG         | Exon     |
